# Supplementary material
Source: Springer Nature journal article supplement (https://www.springermedizin.de/resource/supplementary/12936_2007_478_MOESM7_ESM.pdf/9548134)

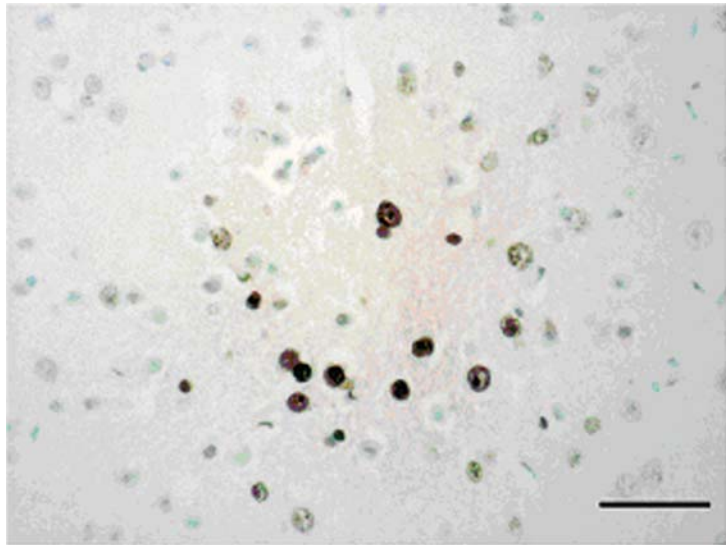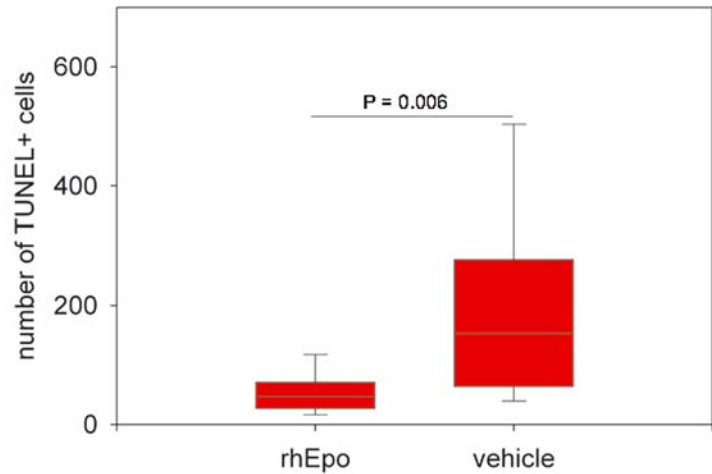

Supplement: MOESM7 [file 9548134]
